# Supplementary material for: A multicountry study on the psychometric properties of the Arabic version of the Sleep Preoccupation Scale (SPS) using both classical testing theory and item response theory
Source: PubMed Central journal article supplement — BMC Psychol. 2024 Oct 8;12:542. doi: 10.1186/s40359-024-02038-4 (PMC11460114; doi:10.1186/s40359-024-02038-4), 2024-10-08
Supplement: 40359_2024_2038_MOESM1_ESM.pdf [file 40359_2024_2038_MOESM1_ESM.pdf]

## Sleep Preoccupation Scale (SPS)

## مقياس الانشغال بالنوم

| Item no. | Item                                                                           | Arabic Translation                                                  | Factor |
|----------|--------------------------------------------------------------------------------|---------------------------------------------------------------------|--------|
| 1        | I feel anxious about my sleep pattern.                                         | أشعر بالقلق حيال نمط نومي.                                          | AC     |
| 2        | I feel anxious about what will happen when I try to sleep tonight.             | أشعر بالقلق حيال ما سيحدث عندما أحاول النوم الليلة.                 | AC     |
| 3        | I try to get to bed early the next day after a bad night's sleep.              | أحاول أن أخلد في النوم مبكراً في اليوم الذي يلي ليلة نوم سيئة.      | CBC    |
| 4        | I find it hard to concentrate during the day after a bad night's sleep.        | أجد صعوبة في التركيز خلال النهار بعد ليلة نوم سيئة.                 | CBC    |
| 5        | My memory appears to be worse after a bad night's sleep.                       | يبدو أن ذاكرتي تسوء بعد ليلة نوم سيئة.                              | CBC    |
| 6        | I am more sensitive to what other people say after a bad night's sleep.        | تزداد حساسيتي تجاه ما يقوله الآخرون بعد ليلة نوم سيئة.              | CBC    |
| 7        | I have to make more of an effort with my appearance after a bad night's sleep. | أبذل جهداً أكبر لتحسين مظهري بعد ليلة نوم سيئة.                     | CBC    |
| 8        | I am more irritable after a bad night's sleep.                                 | أكون أكثر انفعالاً بعد ليلة نوم سيئة.                               | CBC    |
| 9        | I become frustrated when I think about my sleep pattern.                       | يتملكني الإحباط عندما أفكر في نمط نومي.                             | AC     |
| 10       | I get upset when others talk about their "good" sleep patterns.                | أنزعج عندما يتحدث الآخرون عن أنماط "النوم الجيد" لديهم.             | AC     |
| 11       | I have a lie-in after a bad night's sleep.                                     | أتأخر في ترك السرير بعد ليلة نوم سيئة.                              | CBC    |
| 12       | I know that if I have a bad night's sleep, I will also have a bad day.         | أعرف أنه إذا مررت بليلة نوم سيئة، فسيكون يومي التالي سيئاً أيضاً.   | CBC    |
| 13       | I worry about the long-term consequences of poor sleep.                        | أقلق بشأن العواقب طويلة الأمد لقلة النوم.                           | AC     |
| 14       | I cannot perform my daily tasks as well when I have had a bad night's sleep.   | لا أستطيع أداء مهامي اليومية بنفس الكفاءة عندما أمر بليلة نوم سيئة. | CBC    |
| 15       | I think of what "good" sleep would be like.                                    | أتساءل كيف يكون "النوم الجيد".                                      | AC     |
| 16       | I take it easy the next day after a bad night.                                 | أكون متساهلاً في اليوم التالي بعد ليلة نوم سيئة.                    | CBC    |
| 17       | All my problems seem worse after a bad night's sleep.                          | أشعر بأن كل مشاكلي تتفاقم بعد ليلة نوم سيئة.                        | CBC    |
| 18       | I cannot stop dwelling on thoughts of sleep during the day.                    | لا أستطيع التوقف عن التفكير في أمور النوم خلال النهار.              | AC     |
| 19       | I wonder if my sleep patterns will ever become "normal."                       | أتساءل إن كانت أنماط نومي ستصبح "طبيعية" يوماً ما.                  | AC     |
| 20       | I try to avoid other people when I have had a bad night's sleep.               | أحاول تجنب الآخرين عندما أمر بليلة نوم سيئة.                        | CBC    |
| 21       | I yawn more often after a bad night's sleep.                                   | يتكرر تثاؤي كثيراً بعد ليلة نوم سيئة.                               | CBC    |
| 22       | My eyes are more sensitive/sore after a bad night's sleep.                     | تتحسس عيني أكثر وتتورم بعد ليلة نوم سيئة.                           | CBC    |

CBC = Cognitive and behavioral consequences

AC = Affective consequences
